# Supplementary material for: The microRNA-23b/27b/24-1 cluster is a disease progression marker and tumor suppressor in prostate cancer
Source: PubMed Central journal article supplement (PMC4202158; doi:10.18632/oncotarget.2294), 2014-07-31
Supplement: oncotarget-05-7748-s001.pdf [file oncotarget-05-7748-s001.pdf]

## The *microRNA-23b/27b/24-1* cluster is a disease progression marker and tumor suppressor in prostate cancer

### Supplementary Material

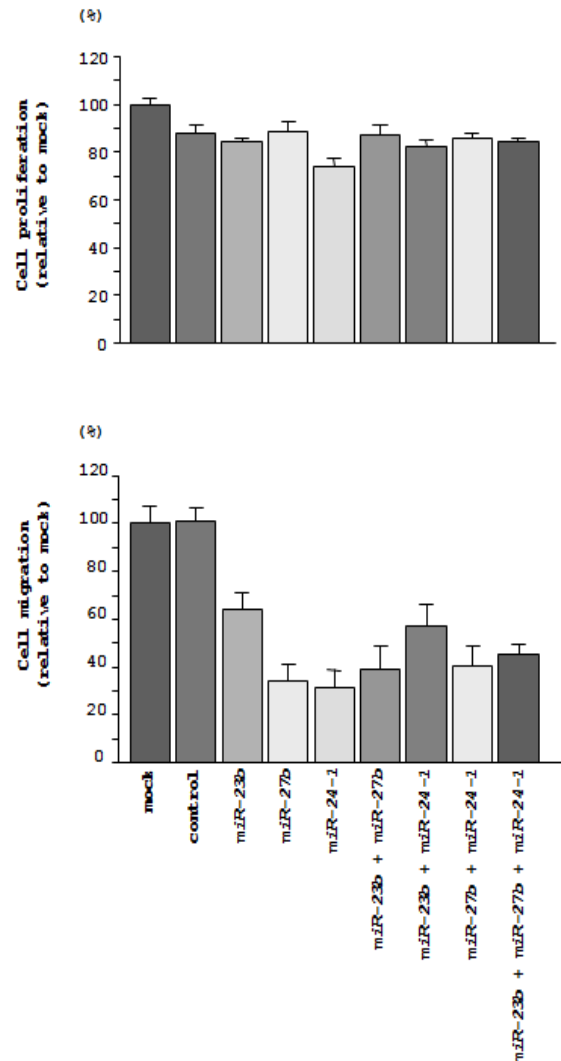

Supplemental Figure 1: Combination effects of mature *miR-23b*, *miR-27b* and *miR-24-1* transfection into PC3 cells. Pre-*miR-23b*, *miR-27b* and *miR-24-1* were used in the gain-of-function assays (XTT and migration). PC3 cells were transiently transfected with combination of these miRNAs with 10 nM for each miRNAs (*miR-23b*, *miR-27b*, *miR-24-1*, *miR-23b* + *miR-27b*, *miR-23b* + *miR-24-1*, *miR-27b* + *miR-24-1* and *miR-23b* + *miR-27b* + *miR-24-1*) using Lipofectamine RNAiMAX transfection reagent.

Supplemental Table 1: Patients' characteristics and clinicopathological features.

| No. | PCa or non-PCa | Age | PSA (ng/mL) | Gleason score | Stage | cT | cN | cM | Treatment                        |
|-----|----------------|-----|-------------|---------------|-------|----|----|----|----------------------------------|
| 1   | PCa            | 67  | 244         | 4+4           | IV    | 4  | 1  | 1  | ADT                              |
| 2   | PCa            | 70  | 395         | 4+4           | IV    | 3a | 1  | 1  | ADT                              |
| 3   | PCa            | 83  | 49.9        | 4+5           | III   | 3a | 0  | 0  | ADT                              |
| 4   | PCa            | 68  | 212         | 4+4           | IV    | 3b | 1  | 0  | ADT                              |
| 5   | PCa            | 80  | 589         | 4+4           | IV    | 3b | 1  | 0  | ADT                              |
| 6   | PCa            | 72  | 2530        | 4+5           | IV    | 3a | 1  | 1  | ADT                              |
| 7   | PCa            | 76  | 12.5        | 4+5           | IV    | 3b | 1  | 1  | ADT                              |
| 8   | PCa            | 67  | 153         | 4+4           | IV    | 4  | 1  | 1  | ADT                              |
| 9   | PCa            | 82  | 808.8       | 4+4           | IV    | 4  | 1  | 1  | ADT                              |
| 10  | PCa            | 88  | 50.5        | 4+4           | III   | 3a | 0  | 0  | ADT                              |
| 11  | PCa            | 69  | 3.45        | 4+3           | III   | 3a | 0  | 0  | Heavy ion radiotherapy           |
| 12  | PCa            | 64  | 486         | 4+5           | IV    | 4  | 1  | 1  | ADT                              |
| 13  | PCa            | 74  | 60.8        | 5+5           | IV    | 4  | 1  | 1  | ADT                              |
| 14  | PCa            | 63  | 49.6        | 4+4           | IV    | 3b | 1  | 0  | ADT                              |
| 15  | PCa            | 69  | 1060        | 4+5           | IV    | 4  | 1  | 1  | ADT                              |
| 16  | PCa            | 67  | 34.9        | 4+4           | IV    | 3b | 1  | 1  | ADT                              |
| 17  | PCa            | 64  | 7.23        | 4+4           | IV    | 3b | 1  | 0  | ADT                              |
| 18  | PCa            | 79  | 3750        | 4+4           | IV    | 3a | 0  | 1  | ADT                              |
| 19  | PCa            | 78  | 1400        | 4+4           | IV    | 3a | 0  | 1  | ADT                              |
| 20  | PCa            | 77  | 2640        | 4+4           | IV    | 4  | 1  | 1  | ADT                              |
| 21  | PCa            | 69  | 554         | 4+4           | IV    | 3b | 1  | 1  | ADT                              |
| 22  | PCa            | 82  | 59.5        | 4+5           | III   | 3b | 0  | 0  | ADT                              |
| 23  | PCa            | 70  | 1030        | 4+4           | IV    | 3b | 1  | 1  | ADT                              |
| 24  | PCa            | 78  | 892         | 4+5           | IV    | 4  | 1  | 1  | ADT                              |
| 25  | PCa            | 86  | 24.2        | 4+4           | III   | 3b | 0  | 0  | ADT                              |
| 26  | PCa            | 67  | 64.6        | 4+5           | IV    | 3b | 0  | 1  | ADT                              |
| 27  | PCa            | 71  | 63.8        | 4+3           | III   | 3a | 0  | 0  | Retropubic radical prostatectomy |
| 28  | PCa            | 75  | 22.7        | 4+4           | III   | 3b | 0  | 0  | ADT                              |
| 29  | PCa            | 87  | 98.59       | 4+5           | IV    | 4  | 1  | 0  | ADT                              |
| 30  | PCa            | 78  | 693         | 4+4           | IV    | 3b | 1  | 1  | ADT                              |
| 31  | PCa            | 76  | 97.4        | 4+4           | IV    | 3b | 1  | 1  | ADT                              |
| 32  | PCa            | 64  | 1120        | 4+4           | IV    | 4  | 1  | 1  | ADT                              |

|    |         |    |       |     |     |    |   |   |     |
|----|---------|----|-------|-----|-----|----|---|---|-----|
| 33 | PCa     | 78 | 266   | 4+4 | IV  | 4  | 1 | 1 | ADT |
| 34 | PCa     | 80 | 571   | 4+4 | IV  | 4  | 1 | 1 | ADT |
| 35 | PCa     | 65 | 277   | 4+5 | IV  | 4  | 1 | 1 | ADT |
| 36 | PCa     | 75 | 1000  | 4+5 | IV  | 4  | 1 | 1 | ADT |
| 37 | PCa     | 69 | 95.6  | 4+4 | IV  | 4  | 1 | 1 | ADT |
| 38 | PCa     | 66 | 36.08 | 4+5 | IV  | 3a | 1 | 0 | ADT |
| 39 | PCa     | 78 | 989   | 4+4 | IV  | 4  | 1 | 1 | ADT |
| 40 | PCa     | 73 | 478   | 4+3 | IV  | 3b | 0 | 1 | ADT |
| 41 | PCa     | 72 | 102   | 4+4 | III | 3a | 0 | 0 | ADT |
| 42 | PCa     | 65 | 212   | 4+4 | IV  | 4  | 1 | 1 | ADT |
| 43 | PCa     | 81 | 11.4  | 4+4 | II  | 2c | 0 | 0 | ADT |
| 44 | PCa     | 73 | 467   | 4+4 | IV  | 3b | 1 | 0 | ADT |
| 45 | PCa     | 58 | 482   | 4+4 | IV  | 3b | 1 | 0 | ADT |
| 46 | PCa     | 73 | 76.4  | 4+4 | III | 3a | 0 | 0 | ADT |
| 47 | PCa     | 79 | 63.2  | 4+5 | IV  | 3b | 1 | 1 | ADT |
| 48 | PCa     | 70 | 248   | 3+4 | IV  | 3a | 1 | 0 | ADT |
| 49 | PCa     | 81 | 1338  | 4+5 | IV  | 4  | 0 | 1 | ADT |
| 50 | non-PCa | 69 | 12.2  | -   | -   | -  | - | - | -   |
| 51 | non-PCa | 66 | 11.9  | -   | -   | -  | - | - | -   |
| 52 | non-PCa | 85 | 10.1  | -   | -   | -  | - | - | -   |
| 53 | non-PCa | 55 | 11.2  | -   | -   | -  | - | - | -   |
| 54 | non-PCa | 67 | 22    | -   | -   | -  | - | - | -   |
| 55 | non-PCa | 66 | 7.33  | -   | -   | -  | - | - | -   |
| 56 | non-PCa | 69 | 7.92  | -   | -   | -  | - | - | -   |
| 57 | non-PCa | 68 | 7.24  | -   | -   | -  | - | - | -   |
| 58 | non-PCa | 53 | 4.33  | -   | -   | -  | - | - | -   |
| 59 | non-PCa | 62 | 5.14  | -   | -   | -  | - | - | -   |
| 60 | non-PCa | 63 | 10    | -   | -   | -  | - | - | -   |
| 61 | non-PCa | 62 | 5.11  | -   | -   | -  | - | - | -   |
| 62 | non-PCa | 74 | 8.3   | -   | -   | -  | - | - | -   |
| 63 | non-PCa | 65 | 4.3   | -   | -   | -  | - | - | -   |
| 64 | non-PCa | 72 | 5.43  | -   | -   | -  | - | - | -   |
| 65 | non-PCa | 66 | 5.35  | -   | -   | -  | - | - | -   |
| 66 | non-PCa | 67 | 5     | -   | -   | -  | - | - | -   |
| 67 | non-PCa | 66 | 19.5  | -   | -   | -  | - | - | -   |
| 68 | non-PCa | 63 | 12.9  | -   | -   | -  | - | - | -   |
| 69 | non-PCa | 53 | 6.69  | -   | -   | -  | - | - | -   |

|    |         |    |      |   |   |   |   |   |   |
|----|---------|----|------|---|---|---|---|---|---|
| 70 | non-PCa | 63 | 5.3  | - | - | - | - | - | - |
| 71 | non-PCa | 66 | 7.73 | - | - | - | - | - | - |
| 72 | non-PCa | 57 | 7.3  | - | - | - | - | - | - |
| 73 | non-PCa | 54 | 5.44 | - | - | - | - | - | - |
| 74 | non-PCa | 67 | 5.93 | - | - | - | - | - | - |
| 75 | non-PCa | 67 | 8.09 | - | - | - | - | - | - |
| 76 | non-PCa | 60 | 14   | - | - | - | - | - | - |
| 77 | non-PCa | 69 | 5.99 | - | - | - | - | - | - |
| 78 | non-PCa | 62 | 5.62 | - | - | - | - | - | - |
| 79 | non-PCa | 52 | 4.41 | - | - | - | - | - | - |
| 80 | non-PCa | 63 | 9.19 | - | - | - | - | - | - |
| 81 | non-PCa | 60 | 5.6  | - | - | - | - | - | - |
| 82 | non-PCa | 56 | 8.44 | - | - | - | - | - | - |
| 83 | non-PCa | 61 | 8.6  | - | - | - | - | - | - |
| 84 | non-PCa | 62 | 35.5 | - | - | - | - | - | - |
| 85 | non-PCa | 73 | 6.02 | - | - | - | - | - | - |
| 86 | non-PCa | 57 | 5.19 | - | - | - | - | - | - |
| 87 | non-PCa | 64 | 4.37 | - | - | - | - | - | - |
| 88 | non-PCa | 60 | 5.68 | - | - | - | - | - | - |
| 89 | non-PCa | 63 | 11.4 | - | - | - | - | - | - |
| 90 | non-PCa | 65 | 13.2 | - | - | - | - | - | - |

---
